# Supplementary material
Source: PubMed Central journal article supplement (PMC3911263)
Supplement: JB.01072-13_zjb999092996so1.pdf [file JB.01072-13_zjb999092996so1.pdf]

## Supplemental Material

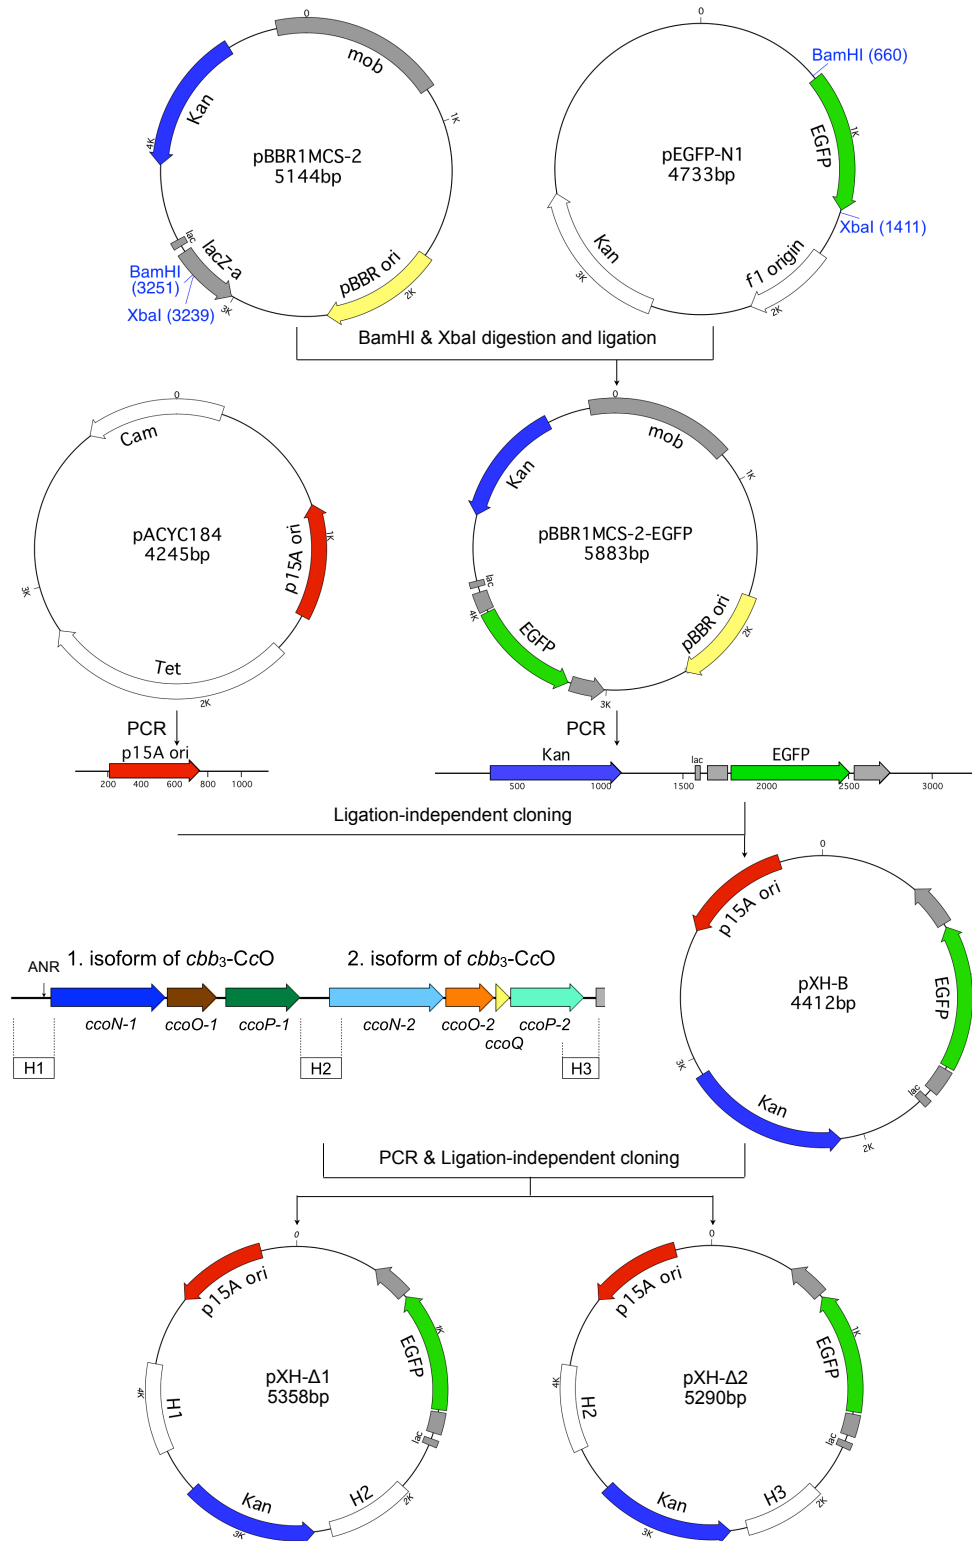

**FIG S1:** Schematic representation of the construction of the suicide plasmids. For details, see text.

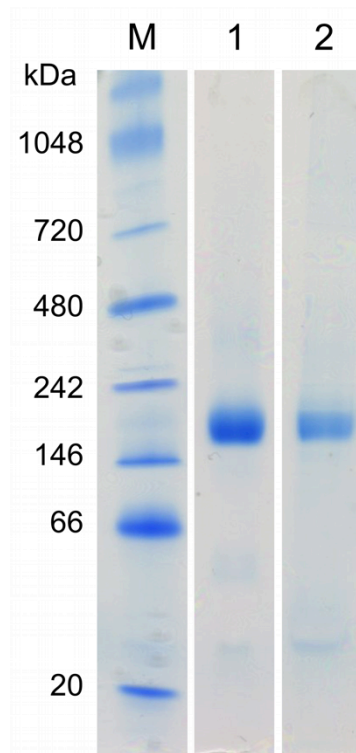

**FIG S2:** BN-PAGE gel of purified recombinant *cbb<sub>3</sub>*-isoforms. Cbb<sub>3</sub>-1 (lane 1) and Cbb<sub>3</sub>-2 (lane 2) were solubilized and purified with DDM as described in Materials and Methods, and analyzed on a blue native PAGE gel (4-16% Bis-Tris gel). The molecular weights (kDa) of the marker proteins (lane M) are indicated on the left.

**A****N Subunit**1<sup>st</sup> isoform of *cbb<sub>3</sub>-CcO* (Cbb<sub>3</sub>-1)

1 MNTATS-TAY SYKVVRFQFAI MTVVWGI VGM GLGVFIAAQL AWPFLNFDLP WTSFGRLRPL HTNAVIFAFG GCALFATSYY  
 81 SVQRTCO TTL FAPKLA AFTF WGWQLVILLA AISLPLGFTS SKEYAELEWP IDILITLVWV AYAVVFFGT L AKRKVKHIYV  
 161 GNWFFGAFIL TVALLHVNN LEIPVTAMKS YSLYAGATDA MVQWYGHNA VGFFLTAGFL GIMYFVVPKQ AERPVS YR L  
 241 SIVHF WALIT VYIWAGPHHL HYTALPDWAQ SLGMVMSLIL LAPSWGGMIN GMMTL SGAWH KLRSDPILRF L VVSLAFYGM  
 321 STFEGPMMAI KTVNALSHYT DWTIGHVHAG ALGWVAMVSI GAlYHLV PKV FGREQMHSIG LINTHFWLAT IGTVLYIASM  
 401 WVNGI AQGLM WRAIN DGT L TYSFVESLEA SHPGFVVRMI GGAIFFAGML VMAYNTWR TV QAAKPAEYDA AAQIASAWSH  
 481 POFEK

2<sup>nd</sup> isoform of *cbb<sub>3</sub>-CcO* (Cbb<sub>3</sub>-2)

1 MStAIsEtAY NyKVVRFQFAI MTVVWGI IGM GLGVFIAAQL VWP SLNLDLP WTSFGRLRPL HTNAVIFAFG GCALFATSYY  
 81 VVQRTCOARL FSDGLAAFTF WGWQAVI VLA VITLPLMgYTS SKEYAELEWP IDILITLVWV SyIAVFFGT I MkrkAKHIYV  
 161 GNWFFGAFIL VTAMLHIVNN LEIPVSLFKS YSIYAGATDA MVQWYGHNA VGFFLT TGF L GMMyFVVPKQ AERPVS YR L  
 241 SIVHF WALIT LYIWAGPHHL HYTALPDWAQ SLGMVMSLIL LAPSWGGMIN GMMTL SGAWH KLR TDPILF L LVVSLAFYGM  
 321 STFEGPMMAI KTVNALSHYT DWTIGHVHAG ALGWVAM ITI GSmYHLI PKV FGREQMHSVg LINAHFWLAT IGTVLYIASM  
 401 wVNGI TQGLM WRAIN EdGT L TYSFVEALEA SHPGF IvrAV GGAFF LAGML LMAYNTWR TV RAAKSAQYDT AAQIASAWSH  
 481 POFEK

**B****O Subunit**1<sup>st</sup> isoform of *cbb<sub>3</sub>-CcO* (Cbb<sub>3</sub>-1)

1 MKSHEKLEKN VGLLTLFMIL AVSIGGLTQI VPLFFQDSVN EPVEGMKPYT ALQLEGRDLY IREGCVGCHS QMIRPFRAET  
 81 ERYGHYSVAG ESVDHPFLW GSKRTGPDLA RVGGRYSDDW HRAHLYNPRN VVPESKMPSY PWLVENTLDG KDTAKMSAL  
 161 RMLGVPYTEE DIAGARD S V N GKTEMDAMVA YLQVLGTALT NKR

2<sup>nd</sup> isoform of *cbb<sub>3</sub>-CcO* (Cbb<sub>3</sub>-2)

1 MKNHEILEKN IGLLTLFMIL AVSIGGLTQI VPLFFQDAVN EPVEGMKPYT ALQLEGRDLY IREGCVGCHS QMIRPFRAET  
 81 ERYGHYSVAG ESVDHPFLW GSKRTGPDLA RVGGRYSDDW HRAHLYNPRN VVPESKMPSY PWLVENTLDG KDTAKMSAL  
 161 RMLGVPYTEE DIAGARD AV R GKTEMDAMVA YLQVLGTALT NKR

**C****P Subunit**1<sup>st</sup> isoform of *cbb<sub>3</sub>-CcO* (Cbb<sub>3</sub>-1)

1 MSTFWSGYIA LLTLGTIVAL FWLIFATRK G ESAGT TDQTM GHAFDGI E EY DNPLPRWWFL LFIgTLVfGI LyLVLYPGLG  
 81 NWKGVLPGYE GGWTQERQwE REVAQADEKY GP I FAKYAAM SVEEVAQDPQ AVKMGARLFA NYCSICHGSD AKGSLGFPNL  
 161 AdQDWRWGGD AASIKTSILN GR I AAMPAG QAIGEEGVKN VAAFVRKDLA GLPLPEGTDA DLSAGKNVYA QTcAVCHGQG  
 241 GEGMAALGAP KLNSAAGW I Y GSSLGQLQQT IrHGRNGOMP AQQQYLGDK VHLLAAYVYS LSQKPEQLAN Q

2<sup>nd</sup> isoform of *cbb<sub>3</sub>-CcO* (Cbb<sub>3</sub>-2)

1 MTSFWSWYVT LLSLGTIAAL VWLLLATRKG QRPDS TEETV GHSYDGI E EY DNPLPRWWFM LFVGT VIFAL GyLVLYPGLG  
 81 NWKGVLPGYE GGWTQVRQwE REMDKANEQY GP I YAKYAAM PVEEVAKDPQ ALKMGARLFA SNCSVCHGSD AKGAYGFPNL  
 161 TdDdWLWGG E PETIKTILH GR QAVMPGWK DVIGEEGIRN VAGYVR-SLS GRDTPEGISV DIEQGQKIFA ANCVCHGPE  
 241 AKGV TAMGAP NLTDNV-wLY GSSFAQIQQT LR YGRNGRMP AQEALGNdk VHLLAAYVYS LSQOPEQ

**D****Q Subunit**2<sup>nd</sup> isoform of *cbb<sub>3</sub>-CcO* (Cbb<sub>3</sub>-2)

1 MMEIGTLRGL GTILVVVAFI GVLWAYSSK RKQSFDEAAN LPFADETDA KKREEASRS KK

**FIG S3:** Peptide mass fingerprinting of the two *cbb*<sub>3</sub>-isoforms (Cbb<sub>3</sub>-1 and Cbb<sub>3</sub>-2). Amino acid sequences of the four subunits CcoN, CcoO, CcoP and CcoQ, are shown in A-D, respectively. The first amino acid on each line is numbered at the left. The unique residues associated with both *cbb*<sub>3</sub>-isoforms are shown as enlarged characters. The sequence coverage obtained using simultaneous nLC-ESI- and nLC-MALDI-MS/MS is indicated in red (ESI only), blue (MALDI only) and purple (detected in both ESI and MALDI-MS). The eight amino acids of the Strep-tag II are indicated by black underlining. The CcoQ subunit was detected only in Cbb<sub>3</sub>-2.

### CcoH

```
1  MRSDNEQTRW YTFWAWFVI AILLSSVVLG LSLTIAIRN SDSLVDNYY DAGKGINQSL EREKLAESLE MRAQLVLNDE  
81  RGLAEVQLSG ASRPQQLVLN LLSPTQPERD RRVILQPQGD GLYQGQMQEP VSGRRFIELI GREGEQDWRL YEEKTIETGH  
161 ALELTP
```

**FIG S4:** Sequence coverage obtained for the assembly protein CcoH in both isolated *cbb*<sub>3</sub>-isoforms. The first amino acid on each line is numbered on the left. Peptides detected by ESI-MS peptide mass fingerprinting are shown in red.

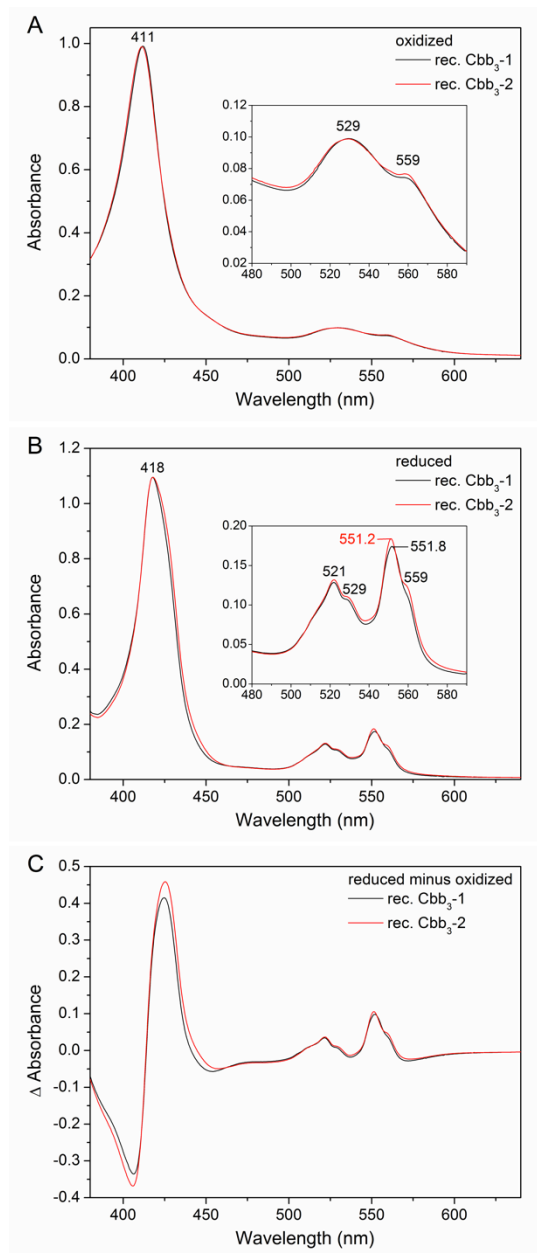

**FIG S5:** UV-Vis spectra of both recombinant *cbb3*-isoforms. The absorption spectra of 2  $\mu$ M recombinant *Cbb3*-1 (black line) and *Cbb3*-2 (red line) were recorded from 380 to 640 nm at 25°C. The insert shows an enlarged view of the  $\alpha$  and  $\beta$  bands from 480 to 590 nm. (A) The *cbb3*-CcOs are fully oxidized by adding potassium hexacyanoferrate (III). (B) The *cbb3*-CcOs are fully reduced by adding sodium dithionite. (C) The reduced minus oxidized difference spectra of *cbb3*-CcOs.

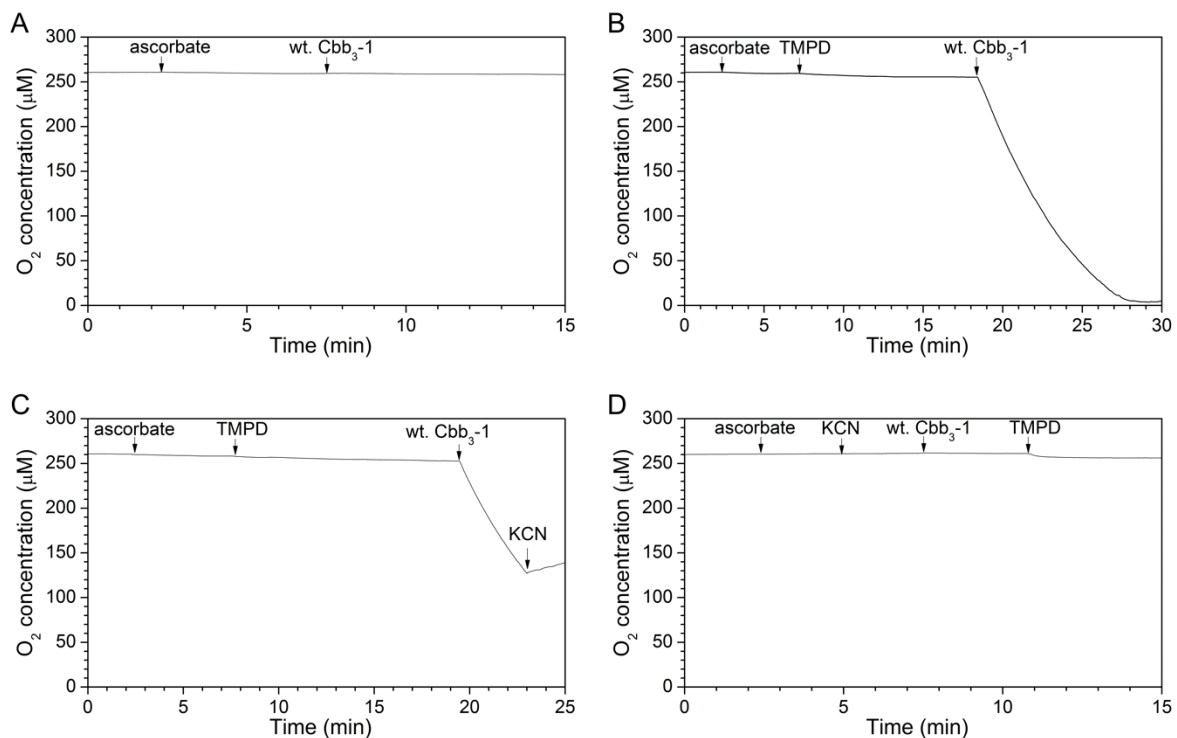

**FIG S6:** Measurements of oxygen reductase activity of *cbb<sub>3</sub>-CcO*. The addition of 3 mM ascorbate, 1 mM TMPD, 8.3 nM *cbb<sub>3</sub>-CcO* and 1 mM KCN is indicated by arrows. (A) No oxygen consumption was observed in the absence of TMPD. (B) The reaction was initiated by adding *cbb<sub>3</sub>-CcO* to a reaction mixture containing ascorbate and TMPD. (C) Inhibition of the *cbb<sub>3</sub>-CcO* by KCN during the turnover. After addition of KCN, the concentration of oxygen was slowly increased because of the back diffusion of oxygen in the reaction mixture. (D) No oxygen consumption was present when KCN was added before the reaction initiation.

**TABLE S1:** Oligonucleotides used in this work

|                                                    | Oligonucleotide                     | Sequence (5'-3') <sup>a</sup>                                                            | Description of amplicon                            |
|----------------------------------------------------|-------------------------------------|------------------------------------------------------------------------------------------|----------------------------------------------------|
| Primers for generation of pXH-B                    | 1_Fw pBBR                           | CCGCCCTATACCTTGTCTGC                                                                     | Kan <sup>r</sup> and EGFP from pBBR1MCS-2-EGFP     |
|                                                    | 1_Rev pBBR                          | GGAAGTCCAGCGCCAGAAAC                                                                     |                                                    |
|                                                    | 1_Fw 184 H2                         | TGGCGTGGACTTCCGTGATGCTGCCAACTTACTG                                                       | p15A origin from pACYC184                          |
|                                                    | 1_Rev 184 H1                        | CAAGGTATAGGGCGGACGATGAGCGCATGTGTTAG                                                      |                                                    |
| Primers for generation of pXH-Δ1 and pXH-Δ2        | 3181 CCW                            | TGCCACCTGGGATGAATGTC                                                                     | linearized pXH-B, 5' insertion site                |
|                                                    | 3228 CW                             | TGTTTCTGGCGCTGGACTTC                                                                     |                                                    |
|                                                    | 1969 CCW                            | TCTCATGCTGGAGTTCTTCG                                                                     | linearized pXH-B, 3' insertion site                |
|                                                    | 2016 CW                             | CGAAGCCCAACCTTTCATAG                                                                     |                                                    |
|                                                    | 3228 CW/cbb3I-F                     | CCAGCGCCAGAAAACACTTGCAGATGGGCCACTCG                                                      | H1-flanking arm, 5' homologous regions             |
|                                                    | 3181 CCW/cbb3I-R                    | TCATCCCAGGTGGCATGTATGGGCTTCCATCCAC                                                       |                                                    |
|                                                    | 3228 CW/cbb3II-F                    | CCAGCGCCAGAAAACCTCGCCGCTATGTTTACAG                                                       | H2-flanking arm, 5' homologous regions             |
| 3181 CCW/cbb3II-R                                  | TCATCCCAGGTGGCACAGGCCATCCCAATGATTC  |                                                                                          |                                                    |
| 2016 CW/cbb3II-F                                   | AAAGGTTGGGCTTCGCTCGCCGCTATGTTTACAG  | H2-flanking arm, 3' homologous regions                                                   |                                                    |
| 1969 CCW/cbb3II-R                                  | AACTCCAGCATGAGACAGGCCATCCCAATGATTC  |                                                                                          |                                                    |
| 2016 CW/cbb3III-F                                  | AAAGGTTGGGCTTCGTGATGCTGGCTGGAAAGAC  | H3-flanking arm, 3' homologous regions                                                   |                                                    |
| 1969 CCW/cbb3III-R                                 | AACTCCAGCATGAGAGATACGTGCCAACCAGGATC |                                                                                          |                                                    |
| Primers for generation of pXH22                    | 7_Fw (M6263)                        | CTTGCAGATGGGCCACTCGAGGCTTGTGTC                                                           | Amplification of <i>ccoNOP-1</i> from genomic DNA  |
|                                                    | 6_Rev (M6263)                       | AAACGGCGGCAAGTATGGAGAAAGCAG                                                              |                                                    |
|                                                    | 1.C Strep Fw                        | CGCGCAGATCGCCAGCGCTTGGAGCCACCCGCAGT                                                      | Strep-tag II at C-terminus of <i>ccoN-1</i>        |
|                                                    | 1.C Strep Rev                       | TCGAAAAATGAGGAGCCTAGG<br>CCTAGGCTCCTCATTTTTCGAACTGCGGGTGGCTCC<br>AAGCGCTGGCGATCTGCGCG    |                                                    |
| ccoN-1-N BamHI                                     | AGTGGATCCCAAGGCGCTCAGCCATTTCG       | Clone of <i>ccoNOP-1</i> + Strep-tag II into pBBR1MCS                                    |                                                    |
| ccoP-1-C HindIII                                   | CGTAAGCTTTCGCAGAGTAGCGGAAGTTG       |                                                                                          |                                                    |
| Primers for generation of pXH26                    | 5_Fw (PCR101)                       | CGGCCTGGGGCCAAGCCATCGGCGAAG                                                              | Amplification of <i>ccoNOQP-2</i> from genomic DNA |
|                                                    | 4_Rev (PCR101)                      | AGTCATCGAGTGCCTACACGCGGGAAG                                                              |                                                    |
|                                                    | 2.C Strep Fw                        | CCGCGCAGATCGCTAGCGCTTGGAGCCACCCGCAG                                                      | Strep-tag II at C-terminus of <i>ccoN-2</i>        |
|                                                    | 2.C Strep Rev                       | TTCGAAAAATGAGGAACGGATAG<br>CTATCCGTTCTCATTTTTCGAACTGCGGGTGGCTCC<br>AAGCGCTAGCGATCTGCGCGG |                                                    |
| IF <i>ccoN-2</i> -N                                | TAGAACTAGTGGATCTCCGCTACTCTGCGACTATC | Clone of <i>ccoNOQP-2</i> + Strep-tag II into pBBR1MCS                                   |                                                    |
| IF <i>ccoP-2</i> -C                                | CGGTATCGATAAGCTGTCCAGCTGCGAATGGTACG |                                                                                          |                                                    |
| Primers for generation of pXH39, promoter exchange | pXH22-Pro-N                         | GTATGGGCTTCCATCCAC                                                                       | Promoter region from <i>ccoNOP-1</i> (pXH22)       |
|                                                    | pXH22-Pro-C                         | ATCGATAACCGTCGACCTC                                                                      |                                                    |
|                                                    | IF-Pro-N                            | GATGGAAGCCATACATGAGCACAGCAATCAG                                                          | Structural genes from <i>ccoNOQP-2</i> (pXH26)     |
|                                                    | IF-Pro-C                            | GTCGACGGTATCGATGTCCAGCTGCGAATGGTACG                                                      |                                                    |
| General sequencing primers for <i>ccoNOP-1</i>     | lacZa_C                             | TACGACTCACTATAGGGCGAATTGGAGC                                                             |                                                    |
|                                                    | 1.Seq                               | CCTCGGGATCATGTACTACTTC                                                                   |                                                    |
|                                                    | 2.Seq                               | TCGGTGGTGCATCTTCTTC                                                                      |                                                    |
|                                                    | 3.Seq                               | AGCCGTCAGGACTTCAATCG                                                                     |                                                    |
| 4.Fw                                               | GCCATCGGCGAAGAAGGCGTGAAGAAC         |                                                                                          |                                                    |
| General sequencing primers for <i>ccoNOQP-2</i>    | lacZa_C1                            | GCGGGCCTTTCGCTATTAC                                                                      |                                                    |
|                                                    | 5.Seq                               | TTCTTCGGCACCATCATGAAGC                                                                   |                                                    |
|                                                    | 10.Fw                               | CAACGAAGACGGCACCTGACCTACTCC                                                              |                                                    |
|                                                    | 7.Seq                               | GGTAACGCATGATGGAATCGG                                                                    |                                                    |
|                                                    | lacZa_N1                            | AGGTTTCCCAGCTGGAAAGC                                                                     |                                                    |

<sup>a</sup> Homologous regions used for the ligation independent cloning are shown in red. The nucleotide sequence encoding the Strep-tag II (with a two amino acid linker) is shown in blue. Restriction enzymes sites are underlined.



**TABLE S2:** Purification of Strep-tagged recombinant Cbb<sub>3</sub>-1

| <b>Purification step</b> | <b>Volume (ml)</b> | <b>Total protein concentration (mg/ml)<sup>a</sup></b> | <b>Total protein (mg)</b> | <b>Total activity (U)<sup>b</sup></b> | <b>Specific activity (U/mg)</b> | <b>Yield (%)</b> | <b>Purification fold</b> |
|--------------------------|--------------------|--------------------------------------------------------|---------------------------|---------------------------------------|---------------------------------|------------------|--------------------------|
| Crude cell extract       | 250.0              | 13.66                                                  | 3415.0                    | 4052                                  | 1.2                             | -                | -                        |
| Crude membrane           | 107.5              | 10.09                                                  | 1084.7                    | 3484                                  | 3.2                             | 100              | 1.0                      |
| Solubilization           | 380.0              | 2.33                                                   | 885.4                     | 2913                                  | 3.3                             | 82               | 1.0                      |
| Strep-Tactin             | 50.0               | 0.17                                                   | 8.5                       | 412                                   | 48.5                            | 0.78             | 15.2                     |
| Q Sepharose              | 23.0               | 0.33                                                   | 7.6                       | 433                                   | 57.1                            | 0.70             | 17.8                     |
| Superdex 200             | 9.6                | 0.78                                                   | 7.5                       | 544                                   | 72.6                            | 0.69             | 22.7                     |

<sup>a</sup> Protein concentration determined by BCA assay using BSA as protein standard.

<sup>b</sup> Enzyme activity was measured using an oxygen electrode. One U is defined as the amount of Cbb<sub>3</sub>-1 required to reduce 1  $\mu$ mol of O<sub>2</sub> in 1 min.
